# Supplementary material for: Distribution Characteristics of the Deep Geothermal Field in the Sichuan Basin and its Main Controlling Factors
Source: Frontiers journal article supplement (doi:10.3389/feart.2022.824056), 2022-03-24
Supplement: Table_1.DOCX [file Table_1.DOCX]

Appendix 1 Thermal conductivity statistics of previous studies in the Sichuan Basin and the surrounding areas

| Strata | Mudstone | | | Sandstone | | | Limestone | | | Dolomite | | | Shale | | | Gypsolyte | | |
| --- | --- | --- | --- | --- | --- | --- | --- | --- | --- | --- | --- | --- | --- | --- | --- | --- | --- | --- |
| K  W/(m·K) | | WAVG | K  W/(m·K) | | WAVG | K  W/(m·K) | | WAVG | K  W/(m·K) | | WAVG | K  W/(m·K) | | WAVG | K  W/(m·K) | | WAVG |
| E |  |  |  | 2.21（34） | Wang et al., 1995 | 2.21 |  |  |  |  |  |  |  |  |  |  |  |  |
| 2.41（3） | Han & Wu, 1993 |  |  |  |  |  |  |  |  |  |  |  |  |
| K | 1.80（14） | Li, 1990 | 1.80 | 2.14（18） | Wang et al., 1995 | 2.37 |  |  |  |  |  |  |  |  |  | 2.39（1） | Xu et al., 2011 | 2.39 |
|  |  |  |  | 2.50（12） | Li, 1990 |  |  |  |  |  |  |  |  |  | 2.39（1） | Tang et al., 2019 |
|  |  |  |  | 2.46（15） | Xu et al., 2011 |  |  |  |  |  |  |  |  |  |  |  |  |
|  |  |  |  | 2.46（15） | Tang et al., 2019 |  |  |  |  |  |  |  |  |  |  |  |  |
| J | 2.20  （50） | Li, 1990 | 2.34 | 2.21（27） | Han & Wu, 1993 | 2.72 | 2.68（7） | Xu et al., 2011 | 2.48 |  |  |  | 2.49（3） | Tang et al., 2019 | 2.43 |  |  |  |
| 2.50（24） | Xu et al., 2011 | 2.70（31） | Li, 1990 | 1.90（5） | Li, 1990 |  |  | 1.80（1） | Li, 1990 |  |  |  |
| 2.47（22） | Tang et al., 2019 | 2.70（29） | Xu et al., 2011 | 2.68（7） | Tang et al., 2019 |  |  |  |  |  |  |  |  |  |
|  |  | 3.22（21） | Tang et al., 2019 |  |  |  |  |  |  |  |  |  |  |  |  |
| T3 | 2.00（2） | Li, 1990 | 2.45 | 2.25（11） | Han & Wu, 1993 | 3.40 |  |  |  |  |  |  | 2.56（5） | Tang et al., 2019 | 2.53 |  |  |  |
| 2.44（6） | Xu et al., 2011 | 3.20（16） | Li, 1990 |  |  |  |  |  | 2.50（5） | Li, 1990 |  |  |  |
| 2.50（17） | Tang et al., 2019 | 3.46（34） | Xu et al., 2011 |  |  |  |  |  |  |  |  |  |  |  |  |
|  |  |  | 3.71（43） | Tang et al., 2019 |  |  |  |  |  |  |  |  |  |  |  |  |
| T1-2 | 2.42（7） | Li et al., 2017 | 2.77 | 2.71（5） | Han & Wu, 1993 | 3.30 | 3.09（21） | Wang et al., 1995 | 2.79 | 4.70  (20) | Li, 1990 | 3.58 |  |  |  | 4.20  (7) | Li, 1990 | 3.94 |
| 2.00（2） | Li, 1990 | 3.62（5） | Xu et al., 2011 | 2.96（7） | Li et al., 2017 | 3.50  (71) | Xu et al., 2011 |  |  |  | 3.60  (3) | Xu et al., 2011 |
| 3.12（1） | Xu et al., 2011 | 3.20（16） | Li, 1990 | 1.84（2） | Han & Wu, 1993 | 3.52  (77) | Tang et al., 2019 |  |  |  | 3.80  (6) | Tang et al., 2019 |
| 3.28（7） | Tang et al., 2019 | 3.70（7） | Tang et al., 2019 | 2.80（25） | Li, 1990 |  |  |  |  |  |  |  |  |  |
|  |  |  |  |  |  | 2.64（23） | Xu et al., 2011 |  |  |  |  |  |  |  |  |  |
|  |  |  |  |  |  | 2.71（34） | Tang et al., 2019 |  |  |  |  |  |  |  |  |  |
| P | 2.59（1） | Li et al., 2017 | 2.40 | 2.49（6） | Wang et al., 1995 | 2.74 | 2.23（3） | Han & Wu, 1993 | 2.76 | 2.55  (11) | Han & Wu, 1993 | 3.23 | 2.40（1） | Li, 1990 | 2.35 |  |  |  |
| 2.36（4） | Xu et al., 2011 | 2.50（1） | Li, 1990 | 2.92（8） | Li et al., 2017 | 4.80  (2) | Li, 1990 | 2.30（1） | Tang et al., 2019 |  |  |  |
| 2.38（3） | Tang et al., 2019 | 2.34（1） | Xu et al., 2011 | 3.06（30） | Wang et al., 1995 | 2.91  (5) | Xu et al., 2011 |  |  |  |  |  |  |
|  |  |  | 3.79（2） | Tang et al., 2019 | 2.80（37） | Li, 1990 | 2.91  (5) | Tang et al., 2019 |  |  |  |  |  |  |
|  |  |  |  |  |  | 2.42（8） | Xu et al., 2011 |  |  |  |  |  |  |  |  |  |
|  |  |  |  |  |  | 2.38（20） | Tang et al., 2019 |  |  |  |  |  |  |  |  |  |
| C |  |  |  | 3.78（3） | Wang et al., 1995 | 3.78 | 3.36（12） | Wang et al., 1995 | 2.99 | 5.69  (3) | Wang et al., 1995 | 4.25 |  |  |  |  |  |  |
|  |  |  |  |  |  | 2.70（6） | Li, 1990 | 3.60  (1) | Li, 1990 |  |  |  |  |  |  |
|  |  |  |  |  |  | 2.22（1） | Xu et al., 2011 | 2.41  (2) | Tang et al., 2019 |  |  |  |  |  |  |
|  |  |  |  |  |  | 2.22（1） | Tang et al., 2019 |  |  |  |  |  |  |  |  |  |
| D |  |  |  | 4.78（6） | Wang et al., 1995 | 4.78 |  |  |  |  |  |  |  |  |  |  |  |  |
| S | 1.98（28） | Li et al., 2017 | 2.25 | 2.98（9） | Li et al., 2017 | 3.51 | 1.89（1） | Han & Wu, 1993 | 2.45 | 4.20  (1) | Li, 1990 | 2.74 | 2.71（17） | Li et al., 2017 | 2.60 |  |  |  |
| 2.50（3） | Li, 1990 | 4.23（10） | Wang et al., 1995 | 2.57（28） | Li et al., 2017 | 2.64  (4) | Xu et al., 2011 | 2.63（22） | Li et al., 2020 |  |  |  |
| 2.46（7） | Xu et al., 2011 | 3.27（10） | Tang et al., 2019 | 2.38（16） | Xu et al., 2011 | 2.38  (3) | Tang et al., 2019 | 2.00（2） | Li, 1990 |  |  |  |
| 2.45（27） | Tang et al., 2019 |  |  |  | 2.35（17） | Tang et al., 2019 |  |  |  | 2.12（3） | Tang et al., 2019 |  |  |  |
| O | 2.03（3） | Li et al., 2017 | 2.03 |  |  |  | 2.82（12） | Li et al., 2017 | 3.06 | 3.80  (2) | Li, 1990 | 3.80 | 2.66（3） | Li et al., 2017 | 2.69 |  |  |  |
|  |  |  |  |  |  | 3.62（17） | Wang et al., 1995 |  |  |  | 2.70（13） | Li et al., 2020 |  |  |  |
|  |  |  |  |  |  | 3.10（4） | Li, 1990 |  |  |  |  |  |  |  |  |  |
|  |  |  |  |  |  | 2.25（2） | Xu et al., 2011 |  |  |  |  |  |  |  |  |  |
|  |  |  |  |  |  | 2.39（8） | Tang et al., 2019 |  |  |  |  |  |  |  |  |  |
| Є | 2.58（8） | Xu et al., 2011 | 2.55 |  |  |  | 2.90（3） | Li, 1990 | 2.90 | 3.093  (3) | Han & Wu, 1993 | 4.44 | 2.73（3） | Tang et al., 2019 | 2.58 |  |  |  |
| 2.49（5） | Tang et al., 2019 |  |  |  |  |  |  | 4.70  (13) | Wang et al., 1995 | 2.50（6） | Li et al., 2020 |  |  |  |
|  |  |  |  |  |  |  |  |  | 4.40  (2) | Li, 1990 |  |  |  |  |  |  |
|  |  |  |  |  |  |  |  |  | 4.61  (2) | Xu et al., 2011 |  |  |  |  |  |  |
|  |  |  |  |  |  |  |  |  | 4.61  (2) | Tang et al., 2019 |  |  |  |  |  |  |
| Z |  |  |  |  |  |  |  |  |  | 6.00  (2) | Li, 1990 | 4.10 | 2.38（3） | Li et al., 2020 | 2.38 |  |  |  |
|  |  |  |  |  |  |  |  |  | 4.01  (20) | Xu et al., 2011 |  |  |  |  |  |  |
|  |  |  |  |  |  |  |  |  | 4.01  (20) | Tang et al., 2019 |  |  |  |  |  |  |
